# Supplementary material for: Longitudinal evaluation of fecal microbiota transplantation for ameliorating calf diarrhea and improving growth performance
Source: PubMed Central journal article supplement (PMC7794225; doi:10.1038/s41467-020-20389-5), 2021-01-08
Supplement: 41467_2020_20389_MOESM1_ESM.pdf [file 41467_2020_20389_MOESM1_ESM.pdf]

## Supplementary Information

### **Longitudinal evaluation of fecal microbiota transplantation for ameliorating calf diarrhea and improving growth performance**

Hyun Sik Kim<sup>1</sup>, Tae Woong Whon<sup>1,3</sup>, Hojun Sung<sup>1</sup>, Yun-Seok Jeong<sup>1</sup>, Eun Sung Jung<sup>2</sup>, Na-Ri Shin<sup>1,4</sup>, Dong-Wook Hyun<sup>1</sup>, Pil Soo Kim<sup>1</sup>, June-Young Lee<sup>1</sup>, Choong Hwan Lee<sup>2</sup>, and Jin-Woo Bae<sup>1\*</sup>

<sup>1</sup>Department of Life and Nanopharmaceutical Sciences and Department of Biology, Kyung Hee University, Seoul 02447, Republic of Korea

<sup>2</sup>Department of Bioscience and Biotechnology, Konkuk University, Seoul 05029, Republic of Korea

<sup>3</sup>Present address: Microbiology and Functionality Research Group, World Institute of Kimchi, Gwangju 61755, Republic of Korea

<sup>4</sup>Present address: Biological Resource Center, Korea Research Institute of Bioscience and Biotechnology, Jeongeup-si, Jeollabuk-do 56212, Republic of Korea

These authors contributed equally: Hyun Sik Kim, Tae Woong Whon

\*e-mail: [baejw@khu.ac.kr](mailto:baejw@khu.ac.kr)

Supplementary Information includes:

- Supplementary Figures 1 to 9
- Supplementary Tables 1 to 7

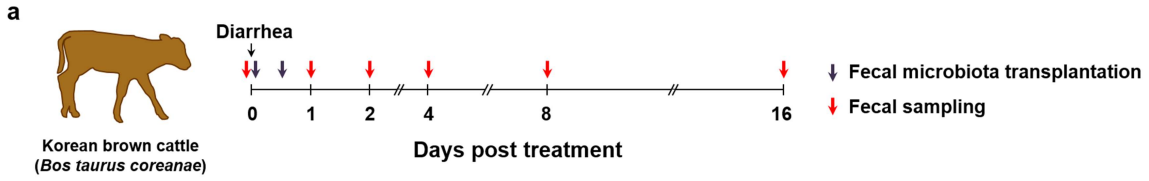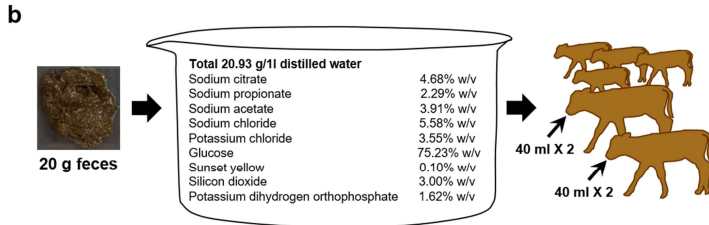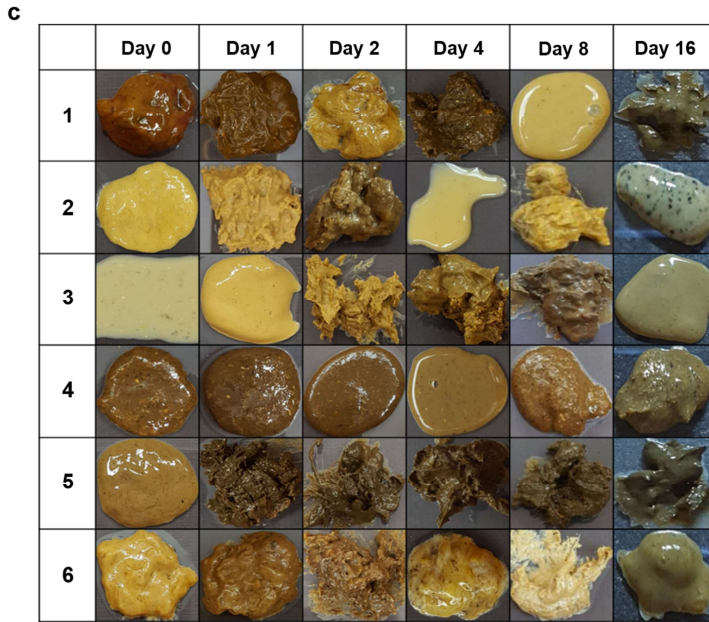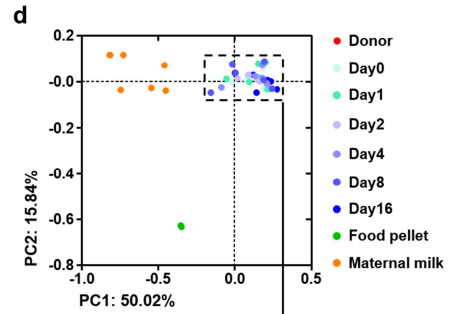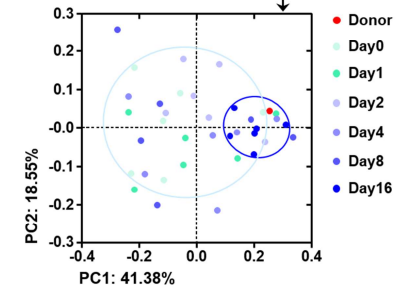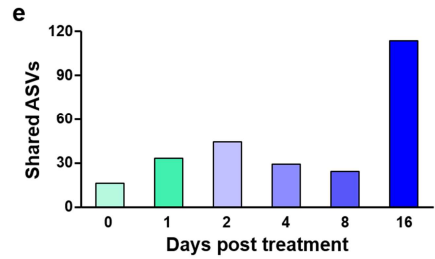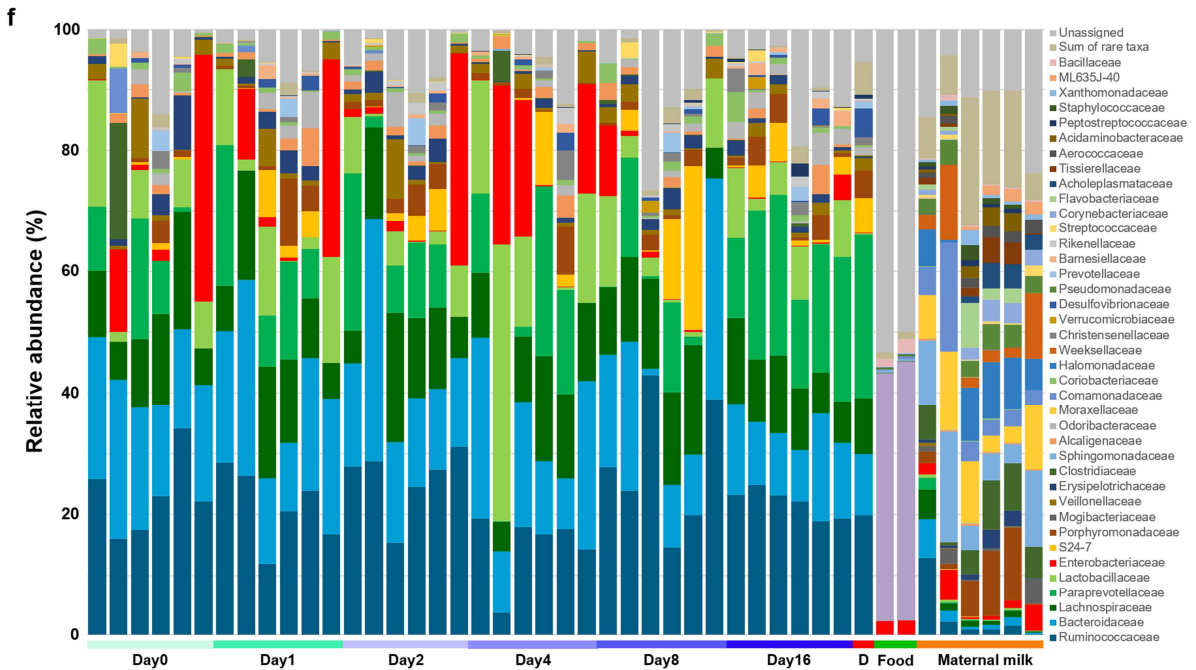

**Supplementary Fig. 1 Details of the preliminary trial conducted to test the safety of oral FMT in calves**

**a** Design of the preliminary FMT trial in calves. **b** Procedures for the preliminary FMT trial. Twenty grams of feces from one healthy donor calf was homogenized and diluted in buffer solution composed of 4% saline [4.68% sodium citrate (w/v), 2.29% sodium propionate (w/v), 3.92% sodium acetate (w/v), 5.59% sodium chloride (w/v), 3.56% potassium chloride (w/v), 75.23% glucose (w/v), 0.1% sunset yellow (w/v), 3.0% silicon dioxide (w/v), and 1.62% potassium dihydrogen orthophosphate (w/v)] and 10% glycerol cryoprotectant. Six recipient calves were administered 40 ml fecal suspension (0.0005 g/ml final concentration) twice daily. **c** Images of the feces collected per rectum from recipient calves 0, 1, 2, 4, 8, and 16 days after the treatment commenced. **d** PCoA, based on the weighted UniFrac distance matrix, of the bacterial 16S rRNA gene sequence data for the feed pellet, maternal milk, and fecal samples 0, 2, 4, 8, 16, 32, and 48 days after the start of treatment. **e** The number of ASVs shared between the feces of recipient calves and the healthy donor calf. **f** The relative abundances of the abundant bacterial families (>0.5% of the mean abundance) shown by metataxonomic analysis of fecal samples are displayed as bar graphs. FMT, fecal microbiota transplantation. Source data are provided as a Source Data file.

**a Day 0 post treatment, contribution (%)**

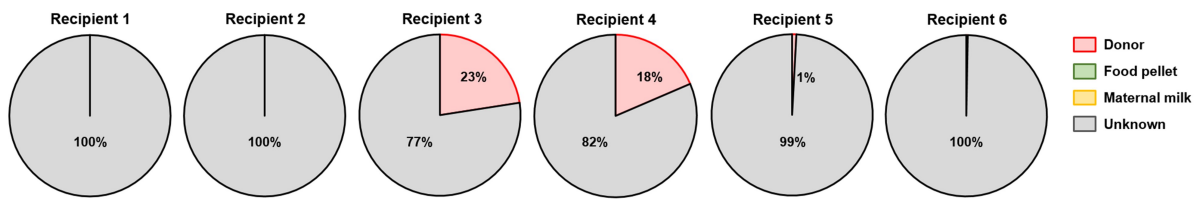

**b Day 16 post treatment, contribution (%)**

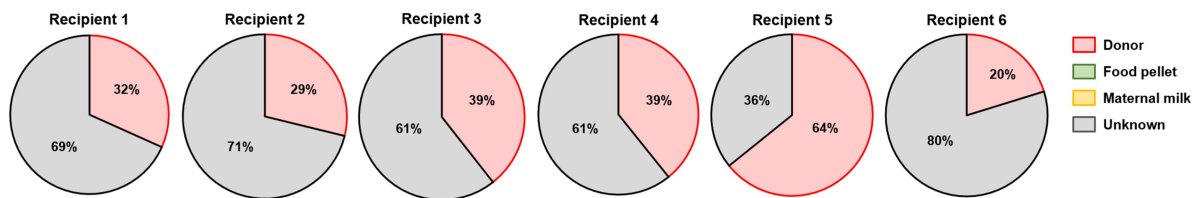

**Supplementary Fig. 2 Estimation of the contribution of each source of bacteria to the microbial communities of the recipient calves in the preliminary trial**

**a–b** Results of SourceTracker analysis, showing the mean contributions of each source of bacteria to the bacterial communities of the recipient calves **(a)** on day 0 and **(b)** day 16 after the start of treatment. The sources of the bacteria were the gut microbiota of donor feces, food pellets, and maternal milk. Related to Supplementary Fig. 1e. Source data are provided as a Source Data file.

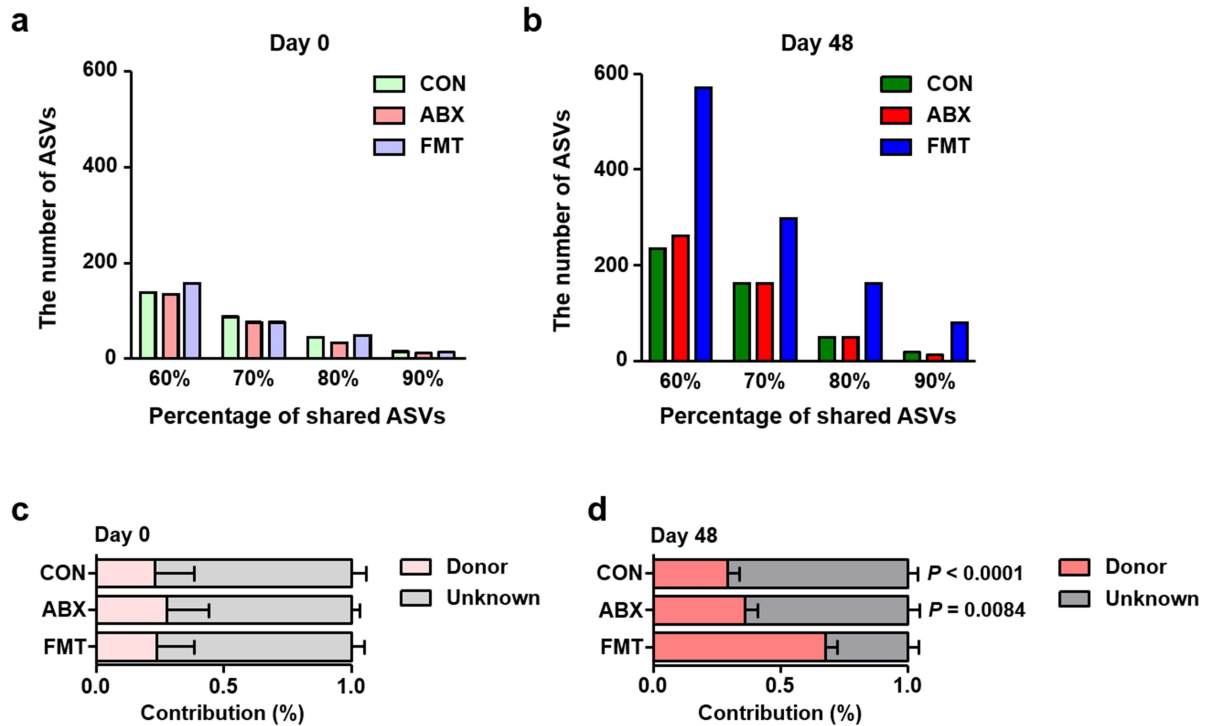

**Supplementary Fig. 3 Contributions of donor feces to the bacterial communities in the CON, ABX, and FMT calves**

**a–b** The number of ASVs shared between the feces of healthy donor calves and the CON, ABX, and FMT calves on **(a)** day 0 and **(b)** day 48 after the start of treatment. The percentages of ASVs shared are shown. **c–d** Results of SourceTracker analysis showing the mean contributions of donor feces to the bacterial communities in the CON ( $n = 14$ ), ABX ( $n = 23$ ), and FMT ( $n = 20$ ) calves on **(c)** day 0 and **(d)** day 48. Source: gut microbiome of donor calves; sinks: CON, ABX, and FMT calves. CON, control; ABX, antibiotic; FMT, fecal microbiota transplantation. Data are shown as mean  $\pm$  SEM. The  $P$ -values were determined using the Mann–Whitney  $U$ -test (two-tailed). Related to Fig. 21. Source data are provided as a Source Data file.

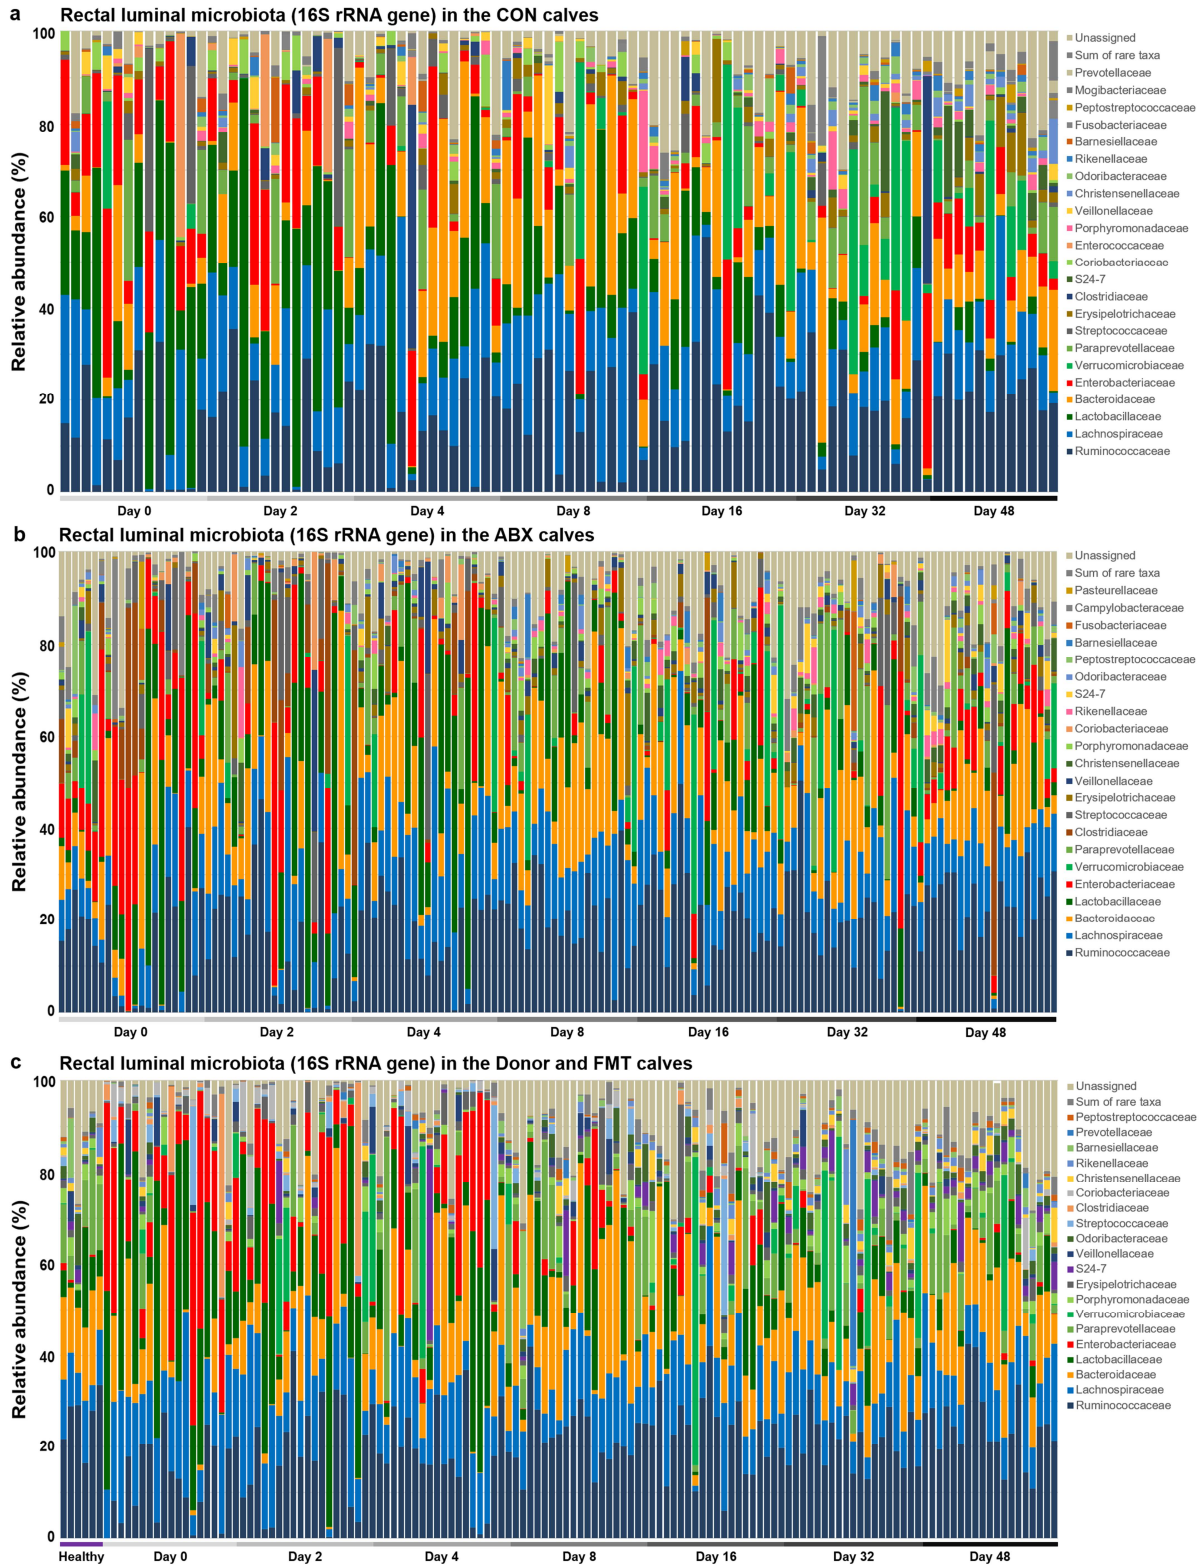

**Supplementary Fig. 4 Relative abundances of the intestinal microbial taxa in the groups during the of the trial**

**a–c** The relative abundances of the abundant bacterial families ( $>0.5\%$  of the mean abundance) shown by metataxonomic analysis of CON **(a)**, ABX **(b)**, and FMT **(c)** fecal samples are

displayed as bar graphs. CON, control; ABX, antibiotic; FMT, fecal microbiota transplantation.  
Related to Fig. 2a–c. Source data are provided as a Source Data file.

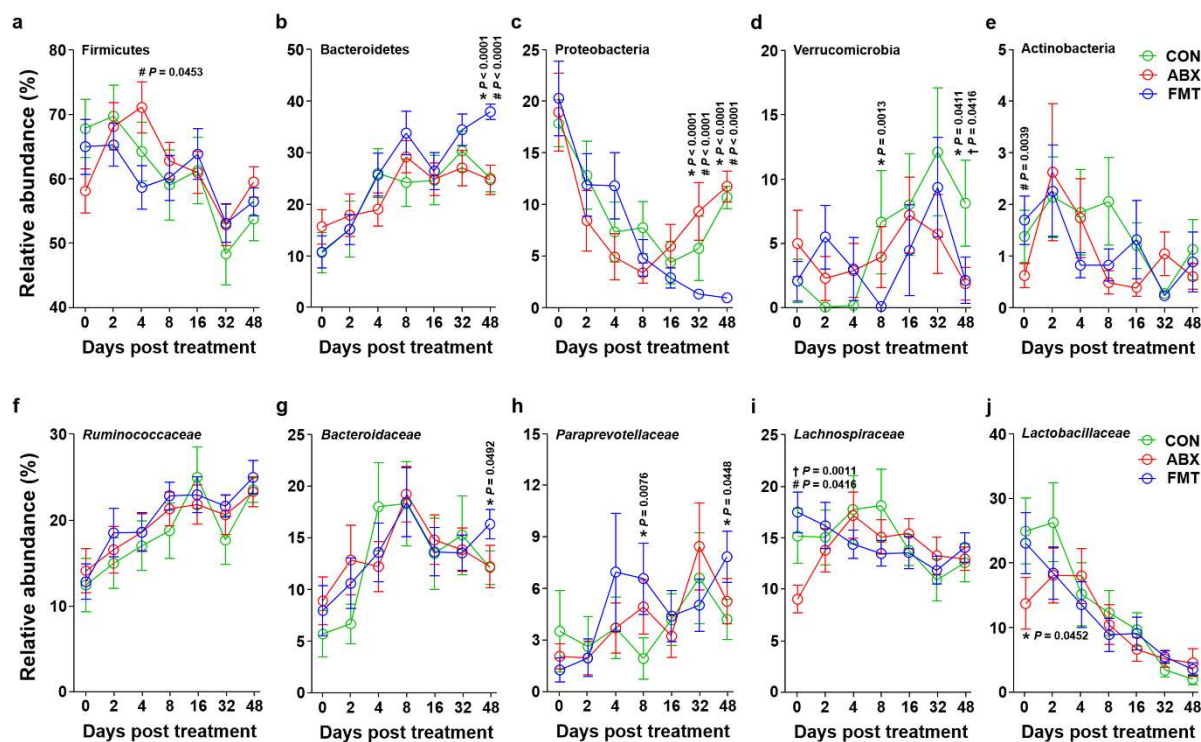

**Supplementary Fig. 5 Changes in the relative abundances of the predominant bacterial phyla and families during the trial**

**a–e** The abundances of the phyla **(a)** Firmicutes, **(b)** Bacteroidetes, **(c)** Proteobacteria, **(d)** Verrucomicrobia and **(e)** Actinobacteria are shown, according to treatment group (CON,  $n = 14$ ; ABX,  $n = 23$ ; FMT,  $n = 20$ ). **f–j** The abundances of the families **(f)** *Ruminococcaceae*, **(g)** *Bacteroidaceae*, **(h)** *Paraprevotellaceae*, **(i)** *Lachnospiraceae* and **(j)** *Lactobacillaceae* are shown, according to treatment group (CON,  $n = 14$ ; ABX,  $n = 23$ ; FMT,  $n = 20$ ). Data are shown as mean  $\pm$  SEM. The  $P$ -values were determined using the Mann–Whitney  $U$ -test (two-tailed). \*Comparison of the CON and FMT groups; #comparison of the ABX and FMT groups; and †comparison of the CON and ABX groups. CON, control; ABX, antibiotic; FMT, fecal microbiota transplantation. Related to Fig. 3e. Source data are provided as a Source Data file.



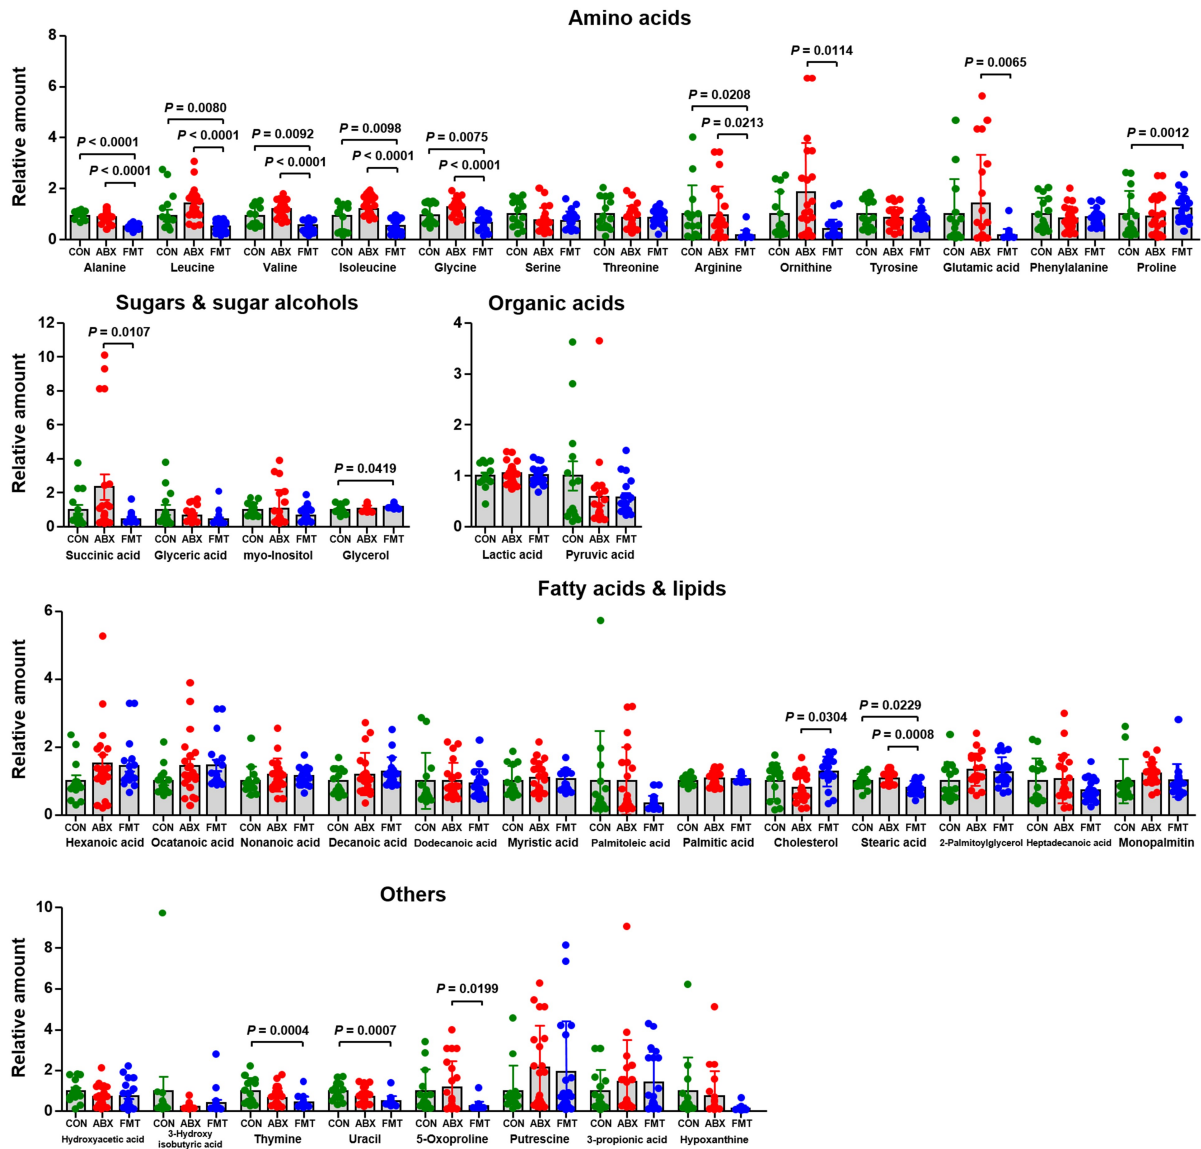

**Supplementary Fig. 6 Relative concentrations of fecal metabolites 48 days after the start of treatment**

The relative concentrations of the fecal metabolites are displayed as bar chart and dot plots (CON,  $n = 14$ ; ABX,  $n = 23$ ; FMT,  $n = 20$ ). Data are shown as mean  $\pm$  SEM. The  $P$ -values were determined using the Mann–Whitney  $U$ -test (two-tailed). Related to Fig. 4b–d. Source data are provided as a Source Data file.

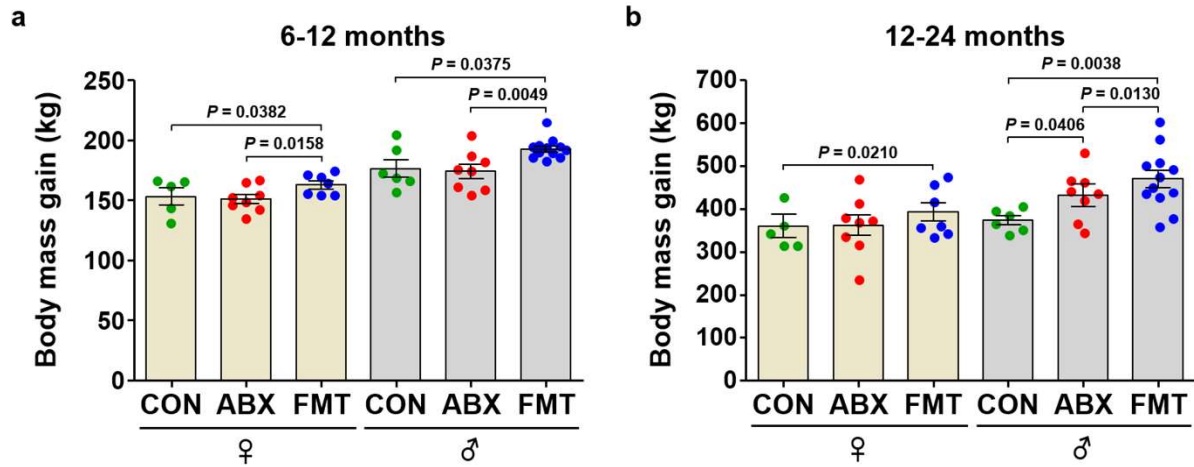

**Supplementary Fig. 7 Body mass gain of the cattle**

Body mass gain of the cattle ( $n = 50$ ) during their 6 months (**a**, from 6-month-old to 12-month-old) and 12 months (**b**, from 12-months-old to 24-months-old) of life. Bar graphs and dot plots are colored according to sex and treatment. Data are shown as mean  $\pm$  SEM. The  $P$ -values were determined using the Mann–Whitney  $U$ -test (two-tailed). CON, control; ABX, antibiotic; FMT, fecal microbiota transplantation. Related to Fig. 5a–d. Source data are provided as a Source Data file.

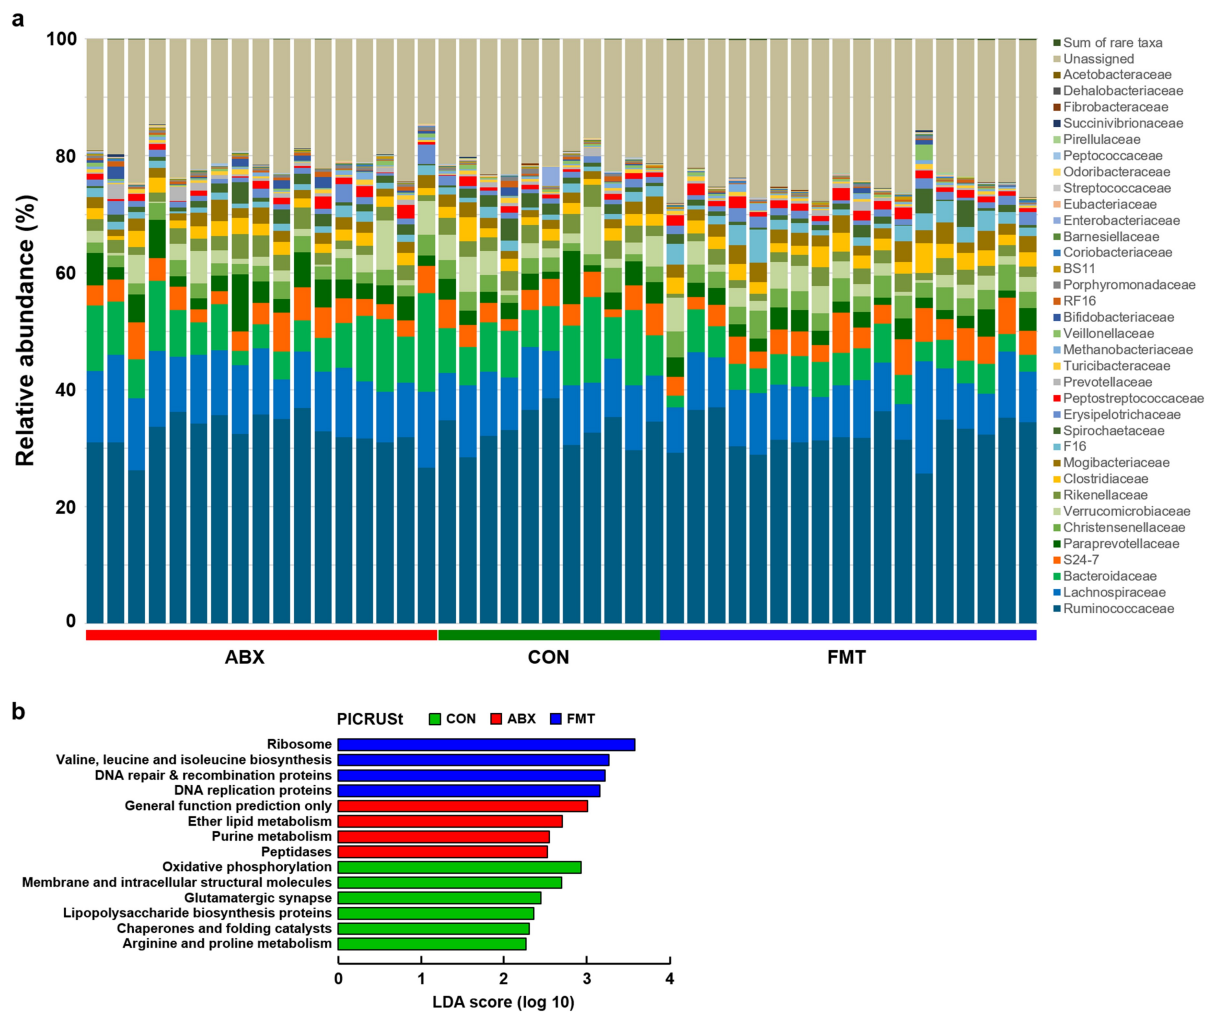

**Supplementary Fig. 8 Relative abundances of the intestinal microbiota in 12-month-old CON, ABX, and FMT cattle**

**a** The relative abundances of the abundant bacterial families (>0.5% of the mean abundance) shown by the metataxonomic analysis of fecal samples are displayed as a bar graph. **b** The predicted functional abundance of the rectal microbiota in 12-month-old CON, ABX, and FMT cattle, as determined using LEfSe and PICRUSt, respectively. The abundances are represented by LDA scores (>2.0). CON, control; ABX, antibiotic; FMT, fecal microbiota transplantation. Related to Fig. 5e–i. Source data are provided as a Source Data file.

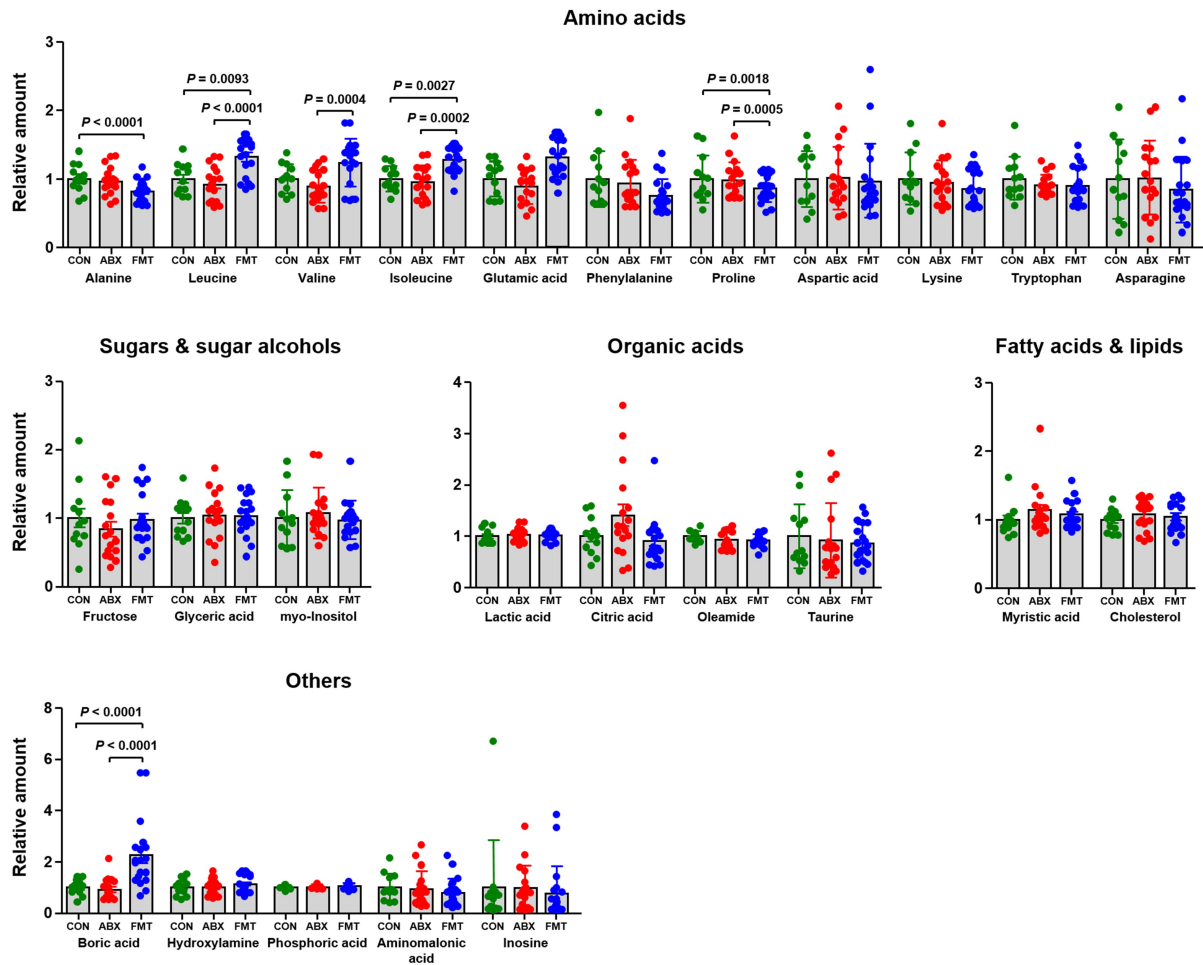

**Supplementary Fig. 9 Relative concentrations of serum metabolites in 12-month-old cattle**

The relative concentrations of serum metabolites are displayed as bar chart and dot plots (CON,  $n = 11$ ; ABX,  $n = 19$ ; FMT,  $n = 20$ ). Data are shown as mean  $\pm$  SEM. The  $P$ -values were determined using the Mann–Whitney  $U$ -test (two-tailed). Related to Fig. 6a–b. Source data are provided as a Source Data file.

**Supplementary Table 1 Description of the samples collected during the preliminary trial**

| <b>Sample ID</b> | <b>Sample</b> | <b>#Sample</b> | <b>Sex</b> | <b>Age (days)</b> | <b>Analysis</b>     |
|------------------|---------------|----------------|------------|-------------------|---------------------|
| Donor            | Feces         | 1              | M          | 24                | 16S rRNA sequencing |
| Recipient 1      | Feces         | 6              | M          | 14–30             | 16S rRNA sequencing |
| Recipient 2      | Feces         | 6              | F          | 12–28             | 16S rRNA sequencing |
| Recipient 3      | Feces         | 6              | F          | 19–35             | 16S rRNA sequencing |
| Recipient 4      | Feces         | 6              | F          | 22–38             | 16S rRNA sequencing |
| Recipient 5      | Feces         | 6              | M          | 10–26             | 16S rRNA sequencing |
| Recipient 6      | Feces         | 6              | M          | 9–25              | 16S rRNA sequencing |
| Mother 1         | Milk          | 1              | F          | N/A               | 16S rRNA sequencing |
| Mother 2         | Milk          | 1              | F          | N/A               | 16S rRNA sequencing |
| Mother 3         | Milk          | 1              | F          | N/A               | 16S rRNA sequencing |
| Mother 4         | Milk          | 1              | F          | N/A               | 16S rRNA sequencing |
| Mother 5         | Milk          | 1              | F          | N/A               | 16S rRNA sequencing |
| Mother 6         | Milk          | 1              | F          | N/A               | 16S rRNA sequencing |
| Feed 1           | Feed          | 1              | N/A        | N/A               | 16S rRNA sequencing |
| Feed 2           | Feed          | 1              | N/A        | N/A               | 16S rRNA sequencing |

Abbreviations: M, male; F, female; #, number of samples; N/A, not applicable.

**Supplementary Table 2 Details of the CON samples collected during the validation trial**

| Sample ID                         | Sample (#) | Sex       | Age (days) | Remission | Death    | Analysis |                                   |
|-----------------------------------|------------|-----------|------------|-----------|----------|----------|-----------------------------------|
| CON1                              | Feces (8)  | Serum (2) | F          | 19        | N        | N        | 16S rRNA sequencing, Metabolomics |
| CON2                              | Feces (8)  | Serum (2) | M          | 10        | N        | N        | 16S rRNA sequencing, Metabolomics |
| CON3                              | Feces (8)  | Serum (2) | F          | 11        | N        | N        | 16S rRNA sequencing, Metabolomics |
| CON4                              | Feces (8)  | Serum (2) | M          | 21        | N        | N        | 16S rRNA sequencing, Metabolomics |
| CON5                              | Feces (8)  | Serum (2) | M          | 16        | Y        | N        | 16S rRNA sequencing, Metabolomics |
| CON6                              | Feces (8)  | Serum (2) | M          | 17        | Y        | N        | 16S rRNA sequencing, Metabolomics |
| CON7                              | Feces (8)  | Serum (2) | F          | 24        | Y        | N        | 16S rRNA sequencing, Metabolomics |
| CON8                              | Feces (8)  | Serum (2) | F          | 28        | N        | N        | 16S rRNA sequencing, Metabolomics |
| CON9                              | Feces (7)  | -         | M          | 13        | N        | Y        | 16S rRNA sequencing               |
| CON10                             | Feces (8)  | Serum (2) | M          | 14        | Y        | N        | 16S rRNA sequencing, Metabolomics |
| CON11                             | Feces (8)  | Serum (2) | F          | 20        | N        | N        | 16S rRNA sequencing, Metabolomics |
| CON12                             | Feces (8)  | Serum (2) | F          | 17        | N        | N        | 16S rRNA sequencing, Metabolomics |
| CON13                             | Feces (5)  | -         | F          | 27        | N        | Y        | 16S rRNA sequencing               |
| CON14                             | Feces (8)  | Serum (2) | M          | 15        | Y        | N        | 16S rRNA sequencing, Metabolomics |
| * <i>P</i> -value for FMT vs. CON |            |           | 0.583      | 0.699     | 0.0003   | 0.069    | -                                 |
| * <i>P</i> -value for FMT vs. ABX |            |           | 0.831      | 0.549     | < 0.0001 | 0.016    | -                                 |

Abbreviations: M, male; F, female; Y, yes; N, no; #, number of samples.

\*Data were analyzed using the Mann–Whitney *U*-test (two-tailed).

**Supplementary Table 3 Details of the ABX samples collected during the validation trial**

| Sample ID | Sample (#)                        |           | Sex   | Age (days) | Remission | Death | Analysis                          |
|-----------|-----------------------------------|-----------|-------|------------|-----------|-------|-----------------------------------|
| ABX1      | Feces (7)                         | -         | F     | 15         | N         | Y     | 16S rRNA sequencing               |
| ABX2      | Feces (7)                         | -         | M     | 15         | N         | Y     | 16S rRNA sequencing               |
| ABX3      | Feces (7)                         | -         | M     | 11         | N         | Y     | 16S rRNA sequencing               |
| ABX4      | Feces (8)                         | Serum (2) | M     | 22         | N         | N     | 16S rRNA sequencing, Metabolomics |
| ABX5      | Feces (8)                         | Serum (2) | M     | 20         | N         | N     | 16S rRNA sequencing, Metabolomics |
| ABX6      | Feces (8)                         | Serum (2) | F     | 19         | N         | N     | 16S rRNA sequencing, Metabolomics |
| ABX7      | Feces (3)                         | -         | F     | 18         | N         | Y     | 16S rRNA sequencing               |
| ABX8      | Feces (8)                         | Serum (2) | M     | 8          | N         | N     | 16S rRNA sequencing, Metabolomics |
| ABX9      | Feces (8)                         | Serum (2) | F     | 11         | N         | N     | 16S rRNA sequencing, Metabolomics |
| ABX10     | Feces (8)                         | Serum (2) | M     | 29         | N         | N     | 16S rRNA sequencing, Metabolomics |
| ABX11     | Feces (8)                         | Serum (2) | M     | 26         | N         | N     | 16S rRNA sequencing, Metabolomics |
| ABX12     | Feces (8)                         | Serum (2) | F     | 13         | N         | N     | 16S rRNA sequencing, Metabolomics |
| ABX13     | Feces (8)                         | Serum (2) | F     | 15         | Y         | N     | 16S rRNA sequencing, Metabolomics |
| ABX14     | Feces (8)                         | Serum (2) | F     | 16         | N         | N     | 16S rRNA sequencing, Metabolomics |
| ABX15     | Feces (8)                         | Serum (2) | M     | 13         | Y         | N     | 16S rRNA sequencing, Metabolomics |
| ABX16     | Feces (8)                         | Serum (2) | F     | 15         | Y         | N     | 16S rRNA sequencing, Metabolomics |
| ABX17     | Feces (8)                         | Serum (2) | M     | 11         | Y         | N     | 16S rRNA sequencing, Metabolomics |
| ABX18     | Feces (8)                         | Serum (2) | M     | 21         | Y         | N     | 16S rRNA sequencing, Metabolomics |
| ABX19     | Feces (8)                         | Serum (2) | F     | 25         | Y         | N     | 16S rRNA sequencing, Metabolomics |
| ABX20     | Feces (8)                         | Serum (2) | M     | 18         | N         | N     | 16S rRNA sequencing, Metabolomics |
| ABX21     | Feces (8)                         | Serum (2) | F     | 22         | N         | N     | 16S rRNA sequencing, Metabolomics |
| ABX22     | Feces (8)                         | Serum (2) | M     | 20         | N         | N     | 16S rRNA sequencing, Metabolomics |
| ABX23     | Feces (8)                         | Serum (2) | M     | 24         | N         | N     | 16S rRNA sequencing, Metabolomics |
|           | * <i>P</i> -value for FMT vs. CON |           | 0.583 | 0.699      | 0.0003    | 0.069 | -                                 |
|           | * <i>P</i> -value for FMT vs. ABX |           | 0.831 | 0.549      | < 0.0001  | 0.016 | -                                 |

Abbreviations: M, male; F, female; Y, yes; N, no; #, number of samples.

\*Data were analyzed using the Mann–Whitney *U*-test (two-tailed).

**Supplementary Table 4 Details of the FMT samples collected during the validation trial**

| Sample ID                         | Sample (#) | Sex       | Age (days) | Remission | Death | Analysis |                                   |
|-----------------------------------|------------|-----------|------------|-----------|-------|----------|-----------------------------------|
| Donor 1                           | Feces (1)  | -         | M          | 34        | -     | -        | 16S rRNA sequencing               |
| Donor 2                           | Feces (1)  | -         | F          | 31        | -     | -        | 16S rRNA sequencing               |
| Donor 3                           | Feces (1)  | -         | M          | 36        | -     | -        | 16S rRNA sequencing               |
| Donor 4                           | Feces (1)  | -         | F          | 48        | -     | -        | 16S rRNA sequencing               |
| Donor 5                           | Feces (1)  | -         | M          | 34        | -     | -        | 16S rRNA sequencing               |
| Donor 6                           | Feces (1)  | -         | M          | 40        | -     | -        | 16S rRNA sequencing               |
| FMT1                              | Feces (8)  | Serum (2) | M          | 15        | Y     | N        | 16S rRNA sequencing, Metabolomics |
| FMT2                              | Feces (8)  | Serum (2) | M          | 11        | Y     | N        | 16S rRNA sequencing, Metabolomics |
| FMT3                              | Feces (8)  | Serum (2) | M          | 21        | Y     | N        | 16S rRNA sequencing, Metabolomics |
| FMT4                              | Feces (8)  | Serum (2) | F          | 25        | Y     | N        | 16S rRNA sequencing, Metabolomics |
| FMT5                              | Feces (8)  | Serum (2) | F          | 16        | Y     | N        | 16S rRNA sequencing, Metabolomics |
| FMT6                              | Feces (8)  | Serum (2) | M          | 16        | Y     | N        | 16S rRNA sequencing, Metabolomics |
| FMT7                              | Feces (8)  | Serum (2) | F          | 17        | Y     | N        | 16S rRNA sequencing, Metabolomics |
| FMT8                              | Feces (8)  | Serum (2) | M          | 28        | Y     | N        | 16S rRNA sequencing, Metabolomics |
| FMT9                              | Feces (8)  | Serum (2) | M          | 24        | Y     | N        | 16S rRNA sequencing, Metabolomics |
| FMT10                             | Feces (8)  | Serum (2) | F          | 20        | Y     | N        | 16S rRNA sequencing, Metabolomics |
| FMT11                             | Feces (8)  | Serum (2) | F          | 9         | Y     | N        | 16S rRNA sequencing, Metabolomics |
| FMT12                             | Feces (8)  | Serum (2) | M          | 16        | Y     | N        | 16S rRNA sequencing, Metabolomics |
| FMT13                             | Feces (8)  | Serum (2) | F          | 15        | N     | N        | 16S rRNA sequencing, Metabolomics |
| FMT14                             | Feces (8)  | Serum (2) | M          | 23        | Y     | N        | 16S rRNA sequencing, Metabolomics |
| FMT15                             | Feces (8)  | -         | M          | 19        | Y     | N        | 16S rRNA sequencing, Metabolomics |
| FMT16                             | Feces (8)  | Serum (2) | M          | 21        | Y     | N        | 16S rRNA sequencing, Metabolomics |
| FMT17                             | Feces (8)  | Serum (2) | F          | 27        | Y     | N        | 16S rRNA sequencing, Metabolomics |
| FMT18                             | Feces (8)  | Serum (2) | M          | 17        | Y     | N        | 16S rRNA sequencing, Metabolomics |
| FMT19                             | Feces (8)  | Serum (2) | M          | 10        | Y     | N        | 16S rRNA sequencing, Metabolomics |
| FMT20                             | Feces (8)  | Serum (2) | F          | 21        | Y     | N        | 16S rRNA sequencing, Metabolomics |
| * <i>P</i> -value for FMT vs. CON |            | 0.583     | 0.699      | 0.0003    | 0.069 | -        |                                   |
| * <i>P</i> -value for FMT vs. ABX |            | 0.831     | 0.549      | < 0.0001  | 0.016 | -        |                                   |

Abbreviations: M, male; F, female; Y, yes; N, no; #, number of samples.

\*Data were analyzed using the Mann–Whitney *U*-test (two-tailed).



**Supplementary Table 5 The composition of the diets**

| Dietary component | Ingredients          | Proportion (%)       |                           |                                 |              |
|-------------------|----------------------|----------------------|---------------------------|---------------------------------|--------------|
|                   |                      | Calf<br>(2–6 months) | Juvenile<br>(7–17 months) | Postpubescent<br>(18–24 months) | Adult mother |
| Solid feed        | Corn                 | -                    | 5                         | 15                              | 4            |
|                   | Concentrated feed    | 10                   | 10                        | 10                              | 10           |
|                   | Wheat                | 10                   | 10                        | 10                              | 10           |
|                   | Brewers' grain       | 10                   | 10                        | 10                              | 10           |
|                   | Corn Gluten Feed     | -                    | 5                         | 6                               | 5            |
|                   | Wheat gluten         | -                    | 5                         | 5                               | 5            |
|                   | Rice bran            | -                    | 4                         | 5                               | 4            |
|                   | Soybean curd residue | 3                    | 5                         | 5                               | 5            |
|                   | Oil cake             | 2                    | 4                         | 4                               | 6            |
|                   | Soybean meal         | 5                    | 5                         | 2                               | -            |
| Solid feed total  |                      | 40                   | 63                        | 72                              | 75           |
| Roughage          | Timothy              | 25                   | 11                        | -                               | -            |
|                   | Alfalfa              | 30                   | 5                         | -                               | -            |
|                   | Sudan grass          | -                    | 10                        | 10                              | 15           |
|                   | Annual Ryegrass      | -                    | -                         | 7                               | 16           |
|                   | Roughage total       |                      | 55                        | 26                              | 17           |
| Others            | Water                | 4.7                  | 10.8                      | 10.9                            | 9.8          |
|                   | Vitamin (PK-BV3)     | 0.3                  | 0.2                       | 0.1                             | 0.2          |
|                   |                      | 100                  | 100                       | 100                             | 100          |

**Supplementary Table 6 Diagnostic multiplex PCR findings in fecal samples from apparently healthy donor calves**

| Host                                    | Donor                                     |                                |   |   |   |   |   |   |   |    |    |    |    |    |    |    |    |    |    |    |   |   |
|-----------------------------------------|-------------------------------------------|--------------------------------|---|---|---|---|---|---|---|----|----|----|----|----|----|----|----|----|----|----|---|---|
|                                         | 1                                         | 2                              | 3 | 4 | 5 | 6 | 7 | 8 | 9 | 10 | 11 | 12 | 13 | 14 | 15 | 16 | 17 | 18 | 19 | 20 |   |   |
| <b>Viruses</b>                          | Group A rotavirus                         |                                |   |   |   |   |   |   |   |    |    |    |    |    |    |    |    |    |    |    | + |   |
|                                         | Group A rotavirus                         |                                |   |   |   |   |   |   |   |    |    |    |    |    |    |    |    |    |    |    |   |   |
|                                         | Group B rotavirus                         |                                | + |   |   |   |   |   |   |    |    |    |    |    |    |    |    |    |    |    |   |   |
|                                         | Group C rotavirus                         |                                | + |   | + | + | + |   | + |    |    |    |    |    |    |    |    |    |    |    |   | + |
|                                         | Bovine coronavirus                        |                                |   |   |   |   |   |   |   |    |    |    |    |    |    |    |    |    |    |    |   | + |
|                                         | Bovine coronavirus                        |                                |   |   |   |   |   |   |   |    |    |    |    |    |    |    |    |    |    |    |   |   |
|                                         | Bovine torovirus                          |                                |   |   |   |   |   |   |   |    |    |    |    |    |    |    |    |    |    |    |   |   |
|                                         | Bovine torovirus                          |                                |   |   |   |   |   |   |   |    |    |    |    |    |    |    |    |    |    |    |   |   |
|                                         | Bovine norovirus                          |                                |   |   |   | + |   |   |   |    |    |    |    |    |    |    |    |    |    |    |   |   |
|                                         | Bovine enteric Nebraska-like calicivirus  |                                |   |   |   |   |   |   |   |    |    |    |    |    |    |    |    |    |    |    |   |   |
|                                         | Bovine nebovirus                          |                                |   |   |   |   |   |   |   |    |    |    |    |    |    |    |    |    |    |    |   |   |
|                                         | Bovine viral diarrhea virus               |                                |   |   |   |   |   |   |   |    |    |    |    |    |    |    |    |    |    |    |   | + |
|                                         | Bovine viral diarrhea virus               |                                |   |   |   |   |   |   |   |    |    |    |    |    |    |    |    |    |    |    |   | + |
|                                         | Bovine viral diarrhea virus               |                                |   |   |   |   |   |   |   |    |    |    |    |    |    |    |    |    |    |    |   | + |
|                                         | <b>Bacteria</b>                           | <i>Clostridium perfringens</i> |   |   |   |   |   |   |   |    |    |    |    |    |    |    |    |    |    |    |   | + |
| <i>Clostridium perfringens</i>          |                                           |                                |   |   |   |   |   |   |   |    |    |    |    |    |    |    |    |    |    |    | + |   |
| <i>Salmonella enterica</i>              |                                           |                                |   |   |   |   |   |   |   |    |    |    |    |    |    |    |    |    |    |    |   |   |
| <i>Salmonella enterica typhimurium</i>  |                                           |                                |   |   |   |   |   |   |   |    |    |    |    |    |    |    |    |    |    |    |   |   |
| Enterotoxigenic <i>Escherichia coli</i> |                                           |                                |   |   |   |   |   |   |   |    |    |    |    |    |    |    |    |    |    |    |   | + |
| Shigatoxigenic <i>Escherichia coli</i>  |                                           |                                |   |   |   |   |   |   |   |    |    |    |    |    |    |    |    |    |    |    |   | + |
| Shigatoxigenic <i>Escherichia coli</i>  |                                           |                                |   |   |   |   |   |   |   |    |    |    |    |    |    |    |    |    |    |    |   | + |
| <b>Protozoa</b>                         | Enterohemorrhagic <i>Escherichia coli</i> |                                |   |   |   |   |   |   |   |    |    |    |    |    |    |    |    |    |    |    |   |   |
|                                         | <i>Eimeria zuernii</i>                    |                                |   |   |   |   |   |   |   |    |    |    |    |    |    |    |    |    |    |    |   | + |

Abbreviations: dsRNA segment 6, double-stranded RNA genome segment 6; VP, viral protein; N, nucleocapsid protein; S, S glycoprotein; M, membrane protein; RdRp, RNA-dependent RNA polymerase; MCP, major capsid protein; BstEII, restriction enzyme BstEII; *sefB*, chaperone protein SefB coding gene; *rfbJ*, CDP-abequose synthase coding gene; *K99*, K99 region 1 gene; *stx1*, shiga toxin type 1; *stx2*, shiga toxin type 2; *eaeA*, enterohemorrhagic *E. coli* O157:H7-specific intimin; *hlyA*, plasmid-encoded enterohemolysin; ITS-1, internal transcribed spacer 1 region of ribosomal RNA gene.

**Supplementary Table 7 Primer sets used for the diagnostic multiplex PCR assay**

|                 | Host                                      | Target gene              | Sequence (5' to 3')        |                          | Reference |
|-----------------|-------------------------------------------|--------------------------|----------------------------|--------------------------|-----------|
|                 |                                           |                          | Forward                    | Reverse                  |           |
| <b>Viruses</b>  | Group A rotavirus                         | dsRNA segment 6          | GGCTTTTAAACGAAGTCTTC       | GGTCACATCCTCTCACTACG     | 1         |
|                 | Group A rotavirus                         | VP7                      | GCCTTTAAAAGCGAGAATTT       | GGTCACATCATACAAYTC TA    | 2         |
|                 | Group B rotavirus                         | VP7                      | GGAAATAATCAGAGATG          | CTACTCGTTTGGCTCCCTCC     | 3         |
|                 | Group C rotavirus                         | VP6                      | TCAAGAAATGGWATGCAACC       | CATAGCMGCTGGTCTWATCA     | 4         |
|                 | Bovine coronavirus                        | N                        | GCAATCCAGTAGTAGAGCGT       | CTTAGTGGCATCCTTGCCAA     | 5         |
|                 | Bovine coronavirus                        | S                        | ATGTTTTTGATACTTTTAATTTCC   | ACACCAGTAGATGGTGCTAT     | 4         |
|                 | Bovine torovirus                          | M                        | TTCTTACTACACTTTTTGGA       | ACTCAAACCTAACACTAG AC    | 4         |
|                 | Bovine torovirus                          | N                        | TAATGGCACTGAAGACTC         | ACATAACATCTTACATGG       | 6         |
|                 | Bovine norovirus                          | RdRp                     | AGTTAYTTTTCTTYTAYGGBGA     | AGTGTCTCTGTCAGTCATCTTCAT | 7         |
|                 | Bovine enteric Nebraska-like calicivirus  | RdRp-MCP                 | TTTCTAACYTATGGGGAYGAYG     | GTCACTCATGTTTCCTTCTCTAAT | 7         |
|                 | Bovine nebovirus                          | Capsid                   | CCACCATTATCACAAATTGC       | CATAATCAGAATAGAAGGCGC    | 8         |
|                 | Bovine viral diarrhea virus               | BstEII                   | GATTTCAAGGGGACTTTTTT       | ACATCTCCTACTAAGTAGTA     | 9         |
|                 | Bovine viral diarrhea virus               | BVDV1 genotype           | GTAGTCGTCAGTGGTTCG         | GCCATGTACAGCAGAGAT       | 9         |
|                 | Bovine viral diarrhea virus               | Polyprotein              | ACAAACATGGTTGGTGCAACTGGT   | CAGACATATTTGCCTAGGTTCCA  | 10        |
| <b>Bacteria</b> | <i>Clostridium perfringens</i>            | 16S rRNA gene            | AAAGATGGCATCATCATTCAAC     | TACCGTCATTATCTTCCCAAAA   | 11        |
|                 | <i>Clostridium perfringens</i>            | <i>alpha-toxin</i> genes | GCTAATGTTACTGCCGTTGACC     | TCTGATACATCGTGTAAG       | 11        |
|                 | <i>Salmonella enterica</i>                | <i>sefB</i>              | AGATTGGGCACTACACGTGT       | TGTACTIONCACCAGGTAATTG   | 12        |
|                 | <i>Salmonella enterica typhimurium</i>    | <i>rfbJ</i>              | CCAGCACCAGTTCCAACCTTGATAC  | GGCTCCGGCTTTATTGGTAAGCA  | 13        |
|                 | Enterotoxigenic <i>Escherichia coli</i>   | <i>K99</i>               | GCTATTAGTGGTCATGGCACTGTAG  | TTTGTTTTGGCTAGGCAGTCATTA | 14        |
|                 | Shigatoxigenic <i>Escherichia coli</i>    | <i>stx1</i>              | GACTGCAAAGACGTATGTAGATTCCG | ATCTATCCCTCTGACATCAACTGC | 15        |
|                 | Shigatoxigenic <i>Escherichia coli</i>    | <i>stx2</i>              | ATTAACCACACCCACCG          | GTCATGGAAACCGTTGTCAC     | 15        |
|                 | Shigatoxigenic <i>Escherichia coli</i>    | <i>eaeA</i>              | GACCCGGCACAAGCATAAGC       | CCACCTGCAGCAACAAGAGG     | 16        |
|                 | Enterohemorrhagic <i>Escherichia coli</i> | <i>hlyA</i>              | GCATCATCAAGCGTACGTTCC      | AATGAGCCAAGCTGGTTAAGCT   | 16        |
| <b>Protozoa</b> | <i>Eimeria zuernii</i>                    | ITS-1                    | GCAAAAGTCGTAACACGGTTTCCG   | CTGCAATTCACAATGCGTATCGC  | 17        |

Abbreviations: dsRNA segment 6, double-stranded RNA genome segment 6; VP, viral protein; N, nucleocapsid protein; S, S glycoprotein; M, membrane protein; RdRp, RNA-dependent RNA polymerase; MCP, major capsid protein; BstEII, restriction enzyme BstEII; *sefB*, chaperone protein SefB coding gene; *rfbJ*, CDP-abequose synthase coding gene; *K99*, K99 region 1 gene; *stx1*, shiga toxin type 1; *stx2*, shiga toxin type 2; *eaeA*, enterohemorrhagic *E. coli* O157:H7-specific intimin; *hlyA*, plasmid-encoded enterohemolysin; ITS-1, internal transcribed spacer 1 region of ribosomal RNA gene.

## References

1. Chinsangaram, J., Akita, G.Y., Castro, A.E. & Osburn, B.I. PCR detection of group A bovine rotaviruses in feces. *Journal of veterinary diagnostic investigation : official publication of the American Association of Veterinary Laboratory Diagnosticians, Inc* **5**, 516-521 (1993).
2. Chang, K.O., Parwani, A.V. & Saif, L.J. The characterization of VP7 (G type) and VP4 (P type) genes of bovine group A rotaviruses from field samples using RT-PCR and RFLP analysis. *Archives of virology* **141**, 1727-1739 (1996).
3. Barman, P. et al. Sequencing and sequence analysis of VP7 and NSP5 genes reveal emergence of a new genotype of bovine group B rotaviruses in India. *Journal of clinical microbiology* **42**, 2816-2818 (2004).
4. Park, S.J. et al. Detection and characterization of bovine coronaviruses in fecal specimens of adult cattle with diarrhea during the warmer seasons. *Journal of clinical microbiology* **44**, 3178-3188 (2006).
5. Cho, K.O. et al. Cross-protection studies between respiratory and calf diarrhea and winter dysentery coronavirus strains in calves and RT-PCR and nested PCR for their detection. *Archives of virology* **146**, 2401-2419 (2001).
6. Duckmanton, L., Carman, S., Nagy, E. & Petric, M. Detection of bovine torovirus in fecal specimens of calves with diarrhea from Ontario farms. *Journal of clinical microbiology* **36**, 1266-1270 (1998).
7. Smiley, J.R., Hoet, A.E., Traven, M., Tsunemitsu, H. & Saif, L.J. Reverse transcription-PCR assays for detection of bovine enteric caliciviruses (BEC) and analysis of the genetic relationships among BEC and human caliciviruses. *Journal of clinical microbiology* **41**, 3089-3099 (2003).
8. Alkan, F. et al. Identification of a Bovine Enteric Calicivirus, Kirklareli Virus, Distantly

- Related to Neboviruses, in Calves with Enteritis in Turkey. *Journal of clinical microbiology* **53**, 3614-3617 (2015).
9. Schmitt, B.J., Lopez, O.J., Ridpath, J.F., Galeota-Wheeler, J. & Osorio, F.A. Evaluation of PCR for diagnosis of bovine viral diarrhea virus in tissue homogenates. *Journal of veterinary diagnostic investigation : official publication of the American Association of Veterinary Laboratory Diagnosticians, Inc* **6**, 44-47 (1994).
  10. Givens, M.D. et al. Analytical sensitivity of assays used for detection of bovine viral diarrhea virus in semen samples from the Southeastern United States. *Veterinary microbiology* **96**, 145-155 (2003).
  11. Wu, J. et al. Detection and toxin typing of *Clostridium perfringens* in formalin-fixed, paraffin-embedded tissue samples by PCR. *Journal of clinical microbiology* **47**, 807-810 (2009).
  12. Wang, S.J., Yeh, D.B. & Wei, C.I. Specific PCR Primers for the Identification of *Salmonella enterica* Serovar Enteritidis in Chicken-Related Samples. *J Food Drug Anal* **17**, 183-189 (2009).
  13. Lim, Y.H. et al. Multiplex polymerase chain reaction assay for selective detection of *Salmonella enterica* serovar typhimurium. *Japanese journal of infectious diseases* **56**, 151-155 (2003).
  14. West, D.M. et al. Rapid detection of *Escherichia coli* virulence factor genes using multiplex real-time TaqMan PCR assays. *Veterinary microbiology* **122**, 323-331 (2007).
  15. Sharma, V.K. & Dean-Nystrom, E.A. Detection of enterohemorrhagic *Escherichia coli* O157:H7 by using a multiplex real-time PCR assay for genes encoding intimin and Shiga toxins. *Veterinary microbiology* **93**, 247-260 (2003).
  16. Paton, A.W. & Paton, J.C. Detection and characterization of Shiga toxigenic *Escherichia coli* by using multiplex PCR assays for *stx1*, *stx2*, *eaeA*, enterohemorrhagic

*E. coli* hlyA, rfbO111, and rfbO157. *Journal of clinical microbiology* **36**, 598-602 (1998).

17. Kawahara, F. et al. Genetic analysis and development of species-specific PCR assays based on ITS-1 region of rRNA in bovine *Eimeria* parasites. *Vet Parasitol* **174**, 49-57 (2010).
