# Supplementary material for: Longitudinal evaluation of fecal microbiota transplantation for ameliorating calf diarrhea and improving growth performance
Source: PubMed Central journal article supplement (PMC7794225; doi:10.1038/s41467-020-20389-5), 2021-01-08
Supplement: 41467_2020_20389_MOESM3_ESM.pdf [file 41467_2020_20389_MOESM3_ESM.pdf]

## **Description of Additional Supplementary Files**

File Name: Supplementary Data 1

Overview of the rectal 16S rRNA dataset generated using MiSeq during the preliminary trial.

File Name: Supplementary Data 2

Overview of the rectal 16S rRNA dataset generated using MiSeq during the validation trial.

File Name: Supplementary Data 3

Overview of the rectal 16S rRNA dataset generated using MiSeq for 12-month-old cattle.
